# Supplementary material for: Bioprotection on Chardonnay Grape: Limits and Impacts of Settling Parameters
Source: Hindawi journal article supplement (doi:10.1155/2022/1489094), 2022-11-30
Supplement: f1 [file 1489094.f1.docx]

**Supplementary data**


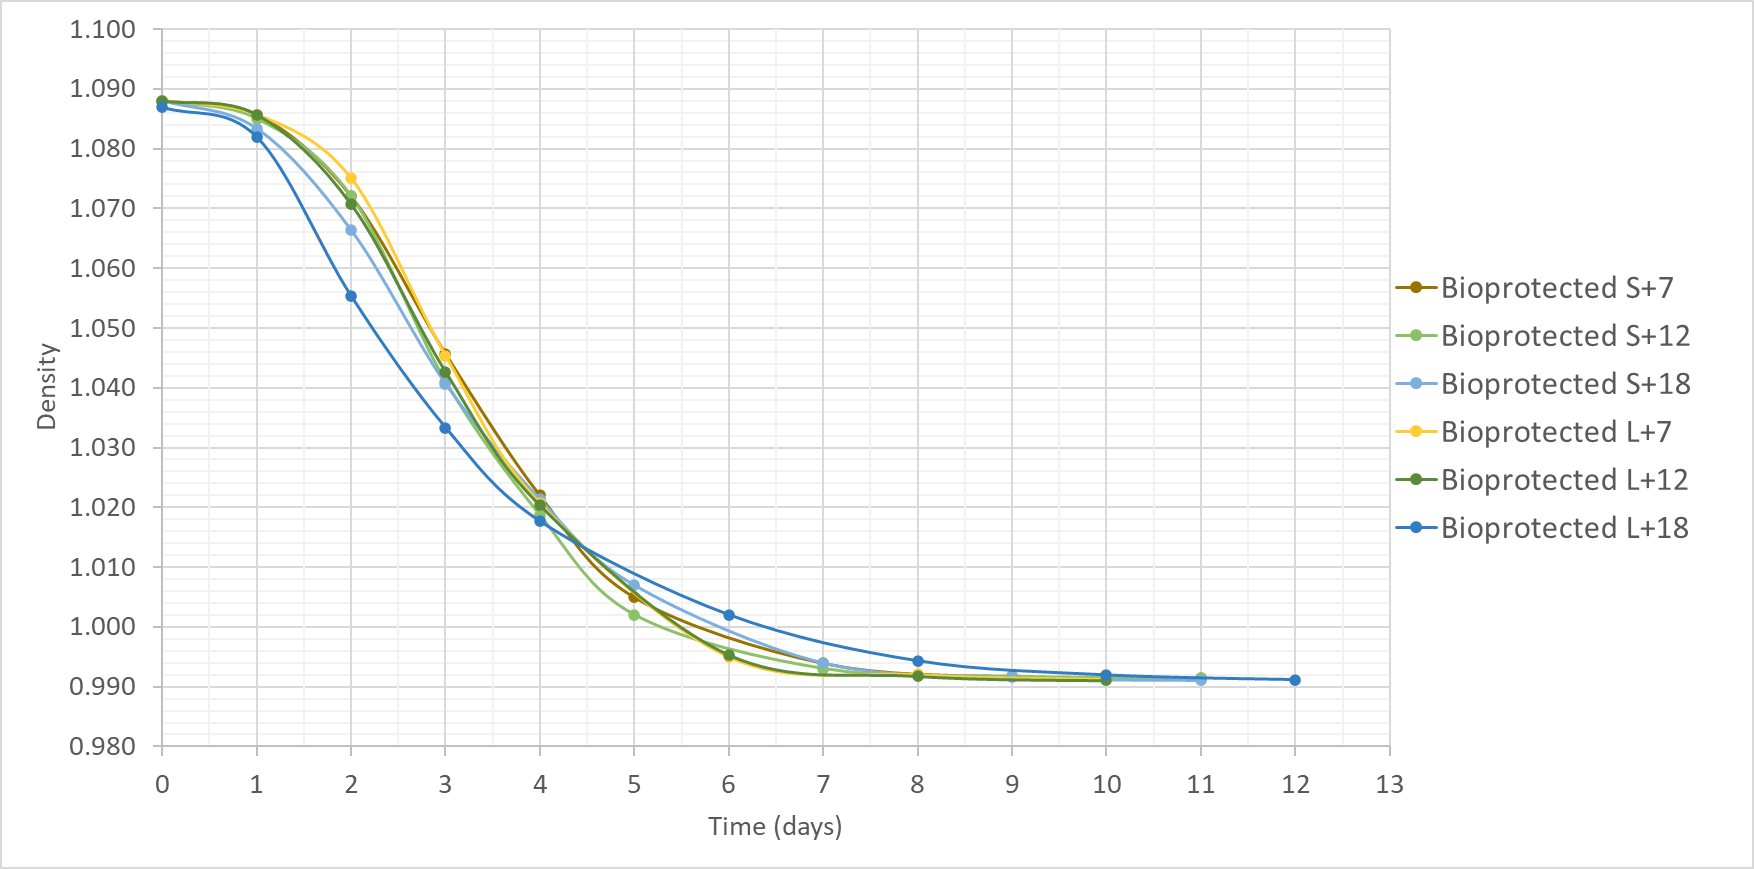


**Figure S1.** Density monitoring as a function of time (days). For a better visibility, the standard deviations have not been added to the graph but are presented in Supplementary data Tab S2.


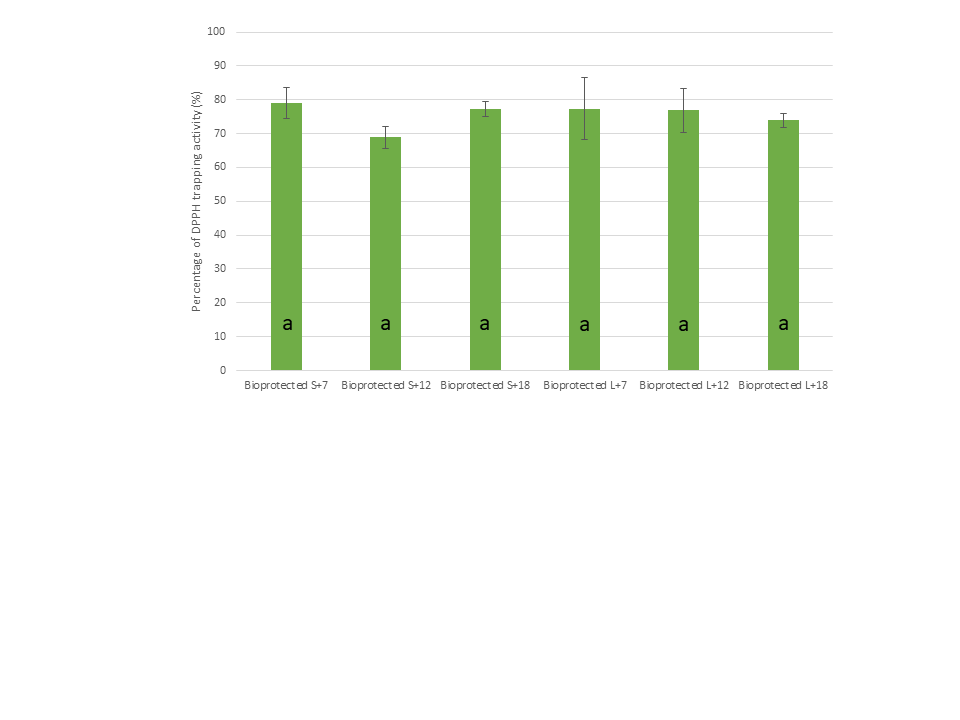


**Figure S2.** Percentage of DPPH trapping activity. The wines were analyzed at the end of alcoholic fermentation. Data were subjected to the Tukey statistical test (95% conf. interval).

**Figure S3**. Hierarchical ascending classification (HAC) of the different modes for all the variables analyzed in this study, except for the DPPH analysis.

**Table S1.** Gradient of solvents A and B for the detection of phenolic compounds in wine.

| Time (min) | Flow rate (mL/min) | % eluent A (aqueous phase containing 0.28% TFA 5%) | % eluent B (methanol) |
| --- | --- | --- | --- |
| 0 | 0.45 | 97 | 3  Elution gradient d’élution  Cleaning  Next run conditioning |
| 3.5 | 0.45 | 97 | 3 |
| 7 | 0.45 | 92 | 8 |
| 10 | 0.45 | 92 | 8 |
| 11 | 0.45 | 90.8 | 9.2 |
| 17 | 0.45 | 82.9 | 17.1 |
| 17.4 | 0.38 | 82.9 | 17.1 |
| 20.4 | 0.38 | 79.6 | 20.4 |
| 25 | 0.36 | 0 | 100 |
| 26 | 0.5 | 0 | 100 |
| 32 | 0.5 | 0 | 100 |
| 33 | 0.36 | 0 | 100 |
| 34 | 0.36 | 97 | 3 |
| 35 | 0.45 | 97 | 3 |

**Table S2.** Density standard deviations as a function of time for all conditions.

| Time (days) | Bioprotected: S+7 | Bioprotected : S+12 | Bioprotected: S+18 | Bioprotected : L+7 | Bioprotected: L+12 | Bioprotected : L+18 |
| --- | --- | --- | --- | --- | --- | --- |
| 0 | 0 | 0 | 0 | 0 | 0 | 0 |
| 1 | 0,58 | 1 | 0,58 | 0,58 | 0,58 | 0 |
| 2 | 1,73 | 1,73 | 0,58 | 1 | 0,58 | 3,79 |
| 3 | 0,58 | 0 | 0,58 | 0,58 | 0,58 | 0,58 |
| 4 | 1 | 0,58 | 0,58 | 0,58 | 0,58 | 0,58 |
| 5 | 1 | 0 | 1 | / | / | / |
| 6 | / | / | / | 0 | 0,58 | 0 |
| 7 | 0 | 0 | 0 | / | / | / |
| 8 | / | / | / | 0,12 | 0,15 | 0,46 |
| 9 | 0,1 | 0,5 | 0,38 | / | / | / |
| 10 | / | / | / | 0,29 | 0,06 | 0,51 |
| 11 | 0,15 | 0 | 0,12 | / | / | / |
| 12 | / | / | / | / | / | 0,25 |

**Table S3.** Standard deviations for the oenological parameters at the end of settling and at the end of AF.

|  | Modes | VA (g/L acetic ac.) | YAN (mg/L) | TPI (mg/L eq. gallic ac.) | Combined SO2 (mg/L) | Total SO2 (mg/L) | Residual sugars (g/L) | Ethanol (%v/v) |
| --- | --- | --- | --- | --- | --- | --- | --- | --- |
| SettlingMusts | S+7 | 0 | 2,65 | 0,06 | - | - | - | - |
| S+12 | 0 | 9,29 | 0,06 | **-** | **-** | **-** | **-** |
| S+18 | 0 | 1,53 | 0,06 | - | - | - | - |
| L+7 | 0 | 5,29 | 0,06 | - | - | - | - |
| L+12 | 0 | 6,51 | 0,06 | - | - | - | - |
| L+18 | 0 | 8,33 | 0,06 | - | - | - | - |
| Wines | S+7 | 0,01 | - | - | 2,08 | 2,00 | 0,01 | 0,02 |
| S+12 | 0,01 | - | - | 1,15 | 1,15 | 0,01 | 0,01 |
| S+18 | 0,01 | - | - | 0,58 | 1,53 | 0,01 | 0,14 |
| L+7 | 0,01 | - | - | 0,58 | 1,00 | 0,02 | 0,02 |
| L+12 | 0,01 | - | - | 1,73 | 2,08 | 0,03 | 0,01 |
| L+18 | 0,02 | - | - | 2,65 | 2,65 | 0,02 | 0,02 |
